# Supplementary material
Source: MDPI journal article supplement (https://www.mdpi.com/1424-8247/16/10/1402)

Supplementary Data. The compound structures confirmed by HPLC and LC-MS/MS data

1. HPLC data compound structures.

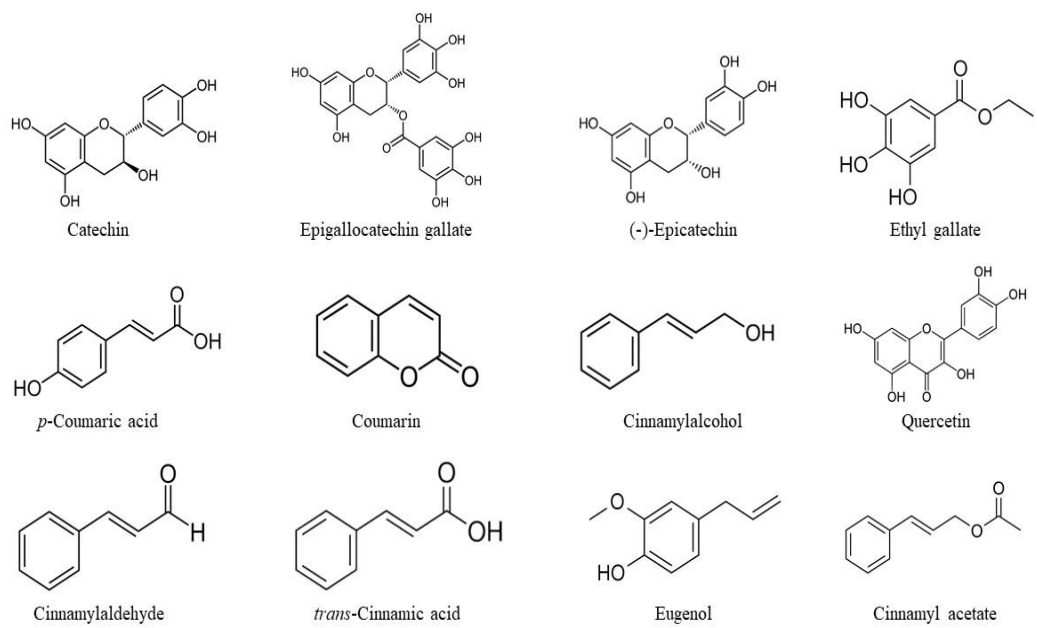

2. LC-MS/MS data compound structures

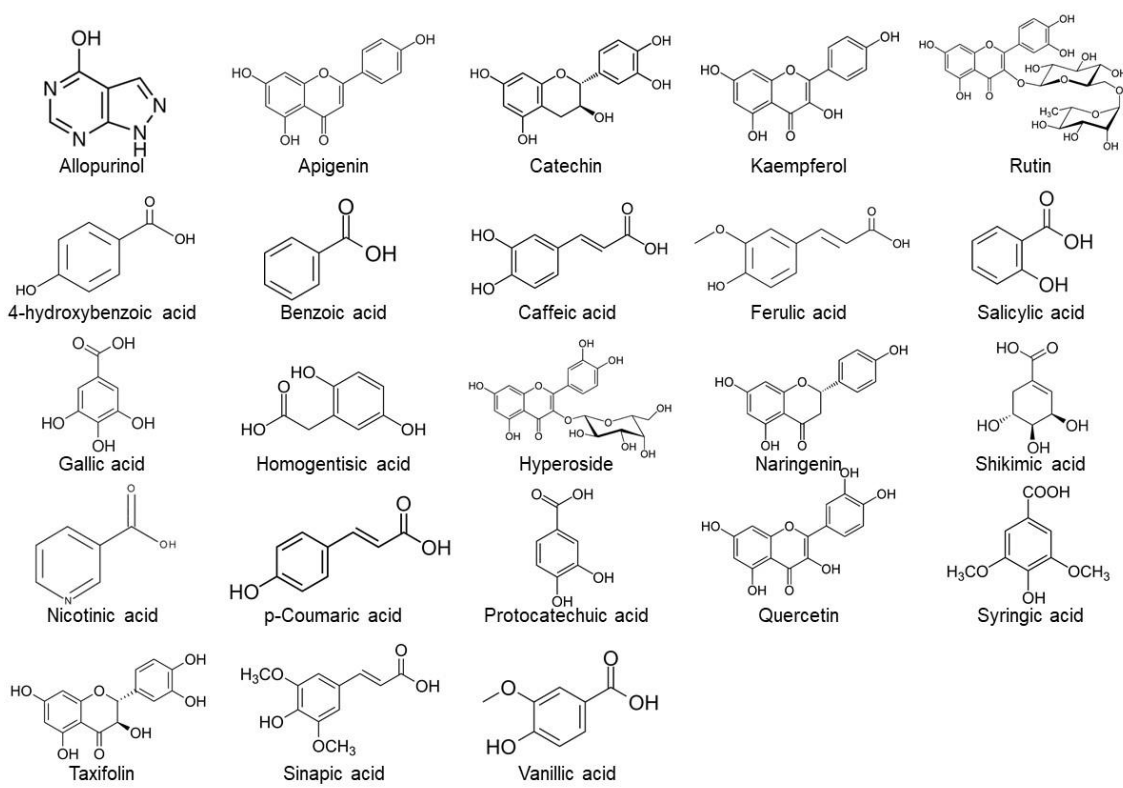

Supplement: s1 [file s1]
